# Supplementary material for: ‘Matching Michigan’: a 2-year stepped interventional programme to minimise central venous catheter-blood stream infections in intensive care units in England
Source: PubMed Central journal article supplement — BMJ Qual Saf. 2012 Sep 20;22(2):110–23. doi: 10.1136/bmjqs-2012-001325 (PMC3585494; doi:10.1136/bmjqs-2012-001325), 2012-09-20
Supplement: bmjqs-2012-001325-s1.pdf [file bmjqs-2012-001325-s1.pdf]

**ESM Table 2. Monthly Infection and CVC Utilisation metrics For Adult (AICU) and Paediatric (PICU) ICUs**

| Year                                                           | 2009                     |       |       |       |       |       |       |       |        | 2010    |        |        |        |        |        |        |        |        |        |        | TOTAL or MEAN |         |
|----------------------------------------------------------------|--------------------------|-------|-------|-------|-------|-------|-------|-------|--------|---------|--------|--------|--------|--------|--------|--------|--------|--------|--------|--------|---------------|---------|
| Calendar Month                                                 | May                      | June  | July  | Aug   | Sept  | Oct   | Nov   | Dec   | Jan    | Feb     | Mar    | Apr    | May    | June   | July   | Aug    | Sept   | Oct    | Nov    | Dec    |               |         |
| Cluster                                                        | 1                        |       |       |       |       |       |       |       |        | + 2 & 3 |        |        |        | + 4    |        |        |        |        |        |        |               |         |
| N° ICUs submitting infection data                              | AICUs                    | 14    | 14    | 15    | 12    | 14    | 15    | 15    | 130    | 140     | 139    | 145    | 147    | 169    | 176    | 180    | 184    | 184    | 185    | 180    | 176           |         |
|                                                                | PICUs                    | 4     | 4     | 4     | 4     | 4     | 4     | 4     | 14     | 14      | 14     | 16     | 15     | 19     | 18     | 18     | 18     | 19     | 18     | 17     | 17            |         |
|                                                                | <b>Total</b>             | 18    | 18    | 19    | 16    | 18    | 19    | 19    | 144    | 154     | 153    | 161    | 162    | 188    | 194    | 198    | 202    | 203    | 203    | 197    | 193           |         |
| N° pre-ICU-infections (CABSI + CRBSI)                          | AICUs                    | 0     | 0     | 0     | 1     | 0     | 3     | 0     | 10     | 19      | 16     | 18     | 12     | 13     | 13     | 9      | 10     | 9      | 11     | 12     | 15            | 171     |
|                                                                | PICUs                    | 0     | 0     | 1     | 1     | 0     | 2     | 1     | 8      | 5       | 1      | 2      | 2      | 1      | 2      | 2      | 3      | 3      | 0      | 2      | 1             | 37      |
|                                                                | <b>Total</b>             | 0     | 0     | 1     | 2     | 0     | 5     | 1     | 18     | 24      | 17     | 20     | 14     | 14     | 15     | 11     | 13     | 12     | 11     | 14     | 16            | 208     |
| N° ICU-acquired infections (CABSI+CRBSI)                       | AICUs                    | 9     | 10    | 5     | 4     | 4     | 8     | 5     | 73     | 93      | 50     | 51     | 52     | 47     | 48     | 52     | 62     | 34     | 47     | 53     | 54            | 761     |
|                                                                | PICUs                    | 2     | 1     | 3     | 0     | 3     | 0     | 1     | 10     | 6       | 7      | 11     | 9      | 16     | 3      | 6      | 12     | 9      | 7      | 5      | 12            | 123     |
|                                                                | <b>Total</b>             | 11    | 11    | 8     | 4     | 7     | 8     | 6     | 83     | 99      | 57     | 62     | 61     | 63     | 51     | 58     | 74     | 43     | 54     | 58     | 66            | 884     |
| % ICUs reporting zero infections (CABSI+CRBSI)                 | AICUs                    | 64%   | 64%   | 80%   | 83%   | 79%   | 73%   | 67%   | 66%    | 60%     | 73%    | 75%    | 76%    | 78%    | 77%    | 81%    | 74%    | 83%    | 80%    | 79%    | 77%           |         |
|                                                                | PICUs                    | 50%   | 75%   | 50%   | 100%  | 75%   | 100%  | 75%   | 57%    | 71%     | 71%    | 63%    | 53%    | 58%    | 89%    | 83%    | 72%    | 74%    | 67%    | 76%    | 59%           |         |
|                                                                | <b>Total</b>             | 61%   | 67%   | 74%   | 88%   | 78%   | 79%   | 68%   | 65%    | 61%     | 73%    | 74%    | 74%    | 76%    | 78%    | 81%    | 74%    | 82%    | 79%    | 79%    | 75%           |         |
| N° CVC-patient days                                            | AICUs                    | 2,150 | 2,117 | 2,284 | 1,673 | 2,048 | 2,282 | 2,279 | 25,671 | 27,967  | 24,527 | 27,176 | 26,166 | 30,151 | 30,527 | 30,917 | 30,985 | 31,777 | 34,476 | 33,105 | 35,974        | 404 252 |
|                                                                | PICUs                    | 349   | 393   | 345   | 326   | 359   | 261   | 295   | 2,117  | 2,118   | 1,871  | 2,508  | 2,172  | 2,870  | 2,558  | 2,645  | 2,604  | 2,726  | 2,799  | 2,384  | 2,935         | 34 635  |
|                                                                | <b>Total</b>             | 2,499 | 2,510 | 2,629 | 1,999 | 2,407 | 2,543 | 2,574 | 27,788 | 30,085  | 26,398 | 29,684 | 28,338 | 33,021 | 33,085 | 33,562 | 33,589 | 34,503 | 37,275 | 35,489 | 38,909        | 438,887 |
| N° patient days, & % ICUs submitting this data                 | AICUs                    | -     | -     | -     | -     | -     | -     | -     | 3,202  | 10,437  | 8,850  | 13,703 | 19,258 | 36,087 | 47,620 | 48,401 | 48,402 | 49,169 | 52,107 | 52,258 | 53,647        | 443,141 |
|                                                                | PICUs                    | -     | -     | -     | -     | -     | -     | -     | 1,040  | 1,069   | 1,217  | 1,347  | 1,160  | 2,662  | 3,782  | 4,314  | 4,063  | 4,311  | 4,480  | 4,139  | 5,029         | 38,613  |
|                                                                | <b>Total</b>             | -     | -     | -     | -     | -     | -     | -     | 4,242  | 11,506  | 10,067 | 15,050 | 20,418 | 38,749 | 51,402 | 52,715 | 52,465 | 53,480 | 56,587 | 56,397 | 58,676        | 481 754 |
| % ICUs submitting                                              | 0%                       | 0%    | 0%    | 0%    | 0%    | 0%    | 0%    | 10%   | 25%    | 24%     | 32%    | 46%    | 76%    | 99%    | 100%   | 98%    | 98%    | 98%    | 100%   | 99%    |               |         |
| CVC-BSI rate: (CVC-BSIs / CVC-patient days X 1000)             | AICUs                    | 4.19  | 4.72  | 2.19  | 2.39  | 1.95  | 3.51  | 2.19  | 2.84   | 3.33    | 2.04   | 1.88   | 1.99   | 1.56   | 1.57   | 1.68   | 2.00   | 1.07   | 1.36   | 1.60   | 1.5           | 1.88    |
|                                                                | PICUs                    | 5.73  | 2.54  | 8.7   | 0     | 8.36  | 0     | 3.39  | 4.72   | 2.83    | 3.74   | 4.39   | 4.14   | 5.57   | 1.17   | 2.27   | 4.61   | 3.3    | 2.5    | 2.1    | 4.09          | 3.58    |
|                                                                | <b>Total</b>             | 4.40  | 4.38  | 3.04  | 2.00  | 2.91  | 3.15  | 2.33  | 2.99   | 3.29    | 2.16   | 2.09   | 2.15   | 1.91   | 1.54   | 1.73   | 2.20   | 1.25   | 1.45   | 1.63   | 1.70          | 2.01    |
| CVC utilisation ratio: (CVC-patient days / Patient days) x 100 | AICUs                    | -     | -     | -     | -     | -     | -     | -     | 71%    | 65%     | 63%    | 63%    | 65%    | 65%    | 64%    | 64%    | 63%    | 63%    | 65%    | 63%    | 66%           |         |
|                                                                | % AICUs submitting       | -     | -     | -     | -     | -     | -     | -     | 9%     | 24%     | 23%    | 32%    | 48%    | 78%    | 99%    | 100%   | 98%    | 98%    | 98%    | 100%   | 99%           |         |
|                                                                | PICUs                    | -     | -     | -     | -     | -     | -     | -     | 55%    | 63%     | 67%    | 58%    | 54%    | 62%    | 68%    | 61%    | 64%    | 63%    | 62%    | 58%    | 58%           |         |
|                                                                | % PICUs submitting       | -     | -     | -     | -     | -     | -     | -     | 27%    | 32%     | 44%    | 31%    | 29%    | 57%    | 100%   | 100%   | 100%   | 100%   | 100%   | 100%   | 100%          |         |
|                                                                | <b>Total CVC-U-Ratio</b> | -     | -     | -     | -     | -     | -     | -     | 67%    | 65%     | 64%    | 62%    | 64%    | 65%    | 64%    | 63%    | 63%    | 63%    | 65%    | 63%    | 66%           |         |

AICU = Adult Intensive Care Unit. PICU = Paediatric Intensive Care Unit. CVC = central venous catheter. BSI = blood stream infection; U-ratio = utilisation ratio

## ESM 1: DEFINITIONS FOR BLOOD STREAM INFECTION, CATHETER-LINKED INFECTION, AND CENTRAL VENOUS CATHETER

### LABORATORY-CONFIRMED BLOOD STREAM INFECTION *must meet at least one of the two criteria below*

Criterion 1

- Patient has one or more recognized pathogens cultured from  $\geq 1$  blood culture

Criterion 2

If the microorganism is a common skin organism (ie, diphtheroids [*Corynebacterium* spp], *Bacillus* [not *B anthracis*] spp, *Propionibacterium* spp, coagulase-negative staphylococci [(CNS), excludes sensitive *Staph aureus*], viridans group streptococci, *Aerococcus* spp, *Micrococcus* spp), *then...*

- It must have been cultured from 2 or more blood cultures drawn on separate occasions, or from one blood culture in a patient in whom antimicrobial therapy has been started, *and*
- Patient has  $\geq 1$  of the following: fever of  $>38^{\circ}\text{C}$ , chills, or hypotension

### CATHETER-ASSOCIATED BLOOD STREAM INFECTION (CABSI)

Criterion

- One of the criteria for BSI above, and
- The presence of one or more central venous catheters at the time of the blood culture, or up to 48 hrs following removal of the CVC and
- The signs & symptoms & positive laboratory results including pathogen cultured from the blood are not primarily related to an infection at another site.

### CATHETER-RELATED BLOOD STREAM INFECTION (CRBSI)

Criterion

- One of the criteria for BSI above, and
- The presence of one or more central venous catheters at the time of the blood culture, or up to 48 hrs following removal of the CVC, and
- One of the following:
  - i. a positive semiquantitative ( $>15$  CFU/catheter segment) or quantitative ( $>10^3$  CFU /ml or  $>10^3$  CFU/catheter segment) culture whereby the same organism (species and antibiogram) is isolated from blood sampled from the CVC or from the catheter tip, and peripheral blood;
  - ii. simultaneous quantitative blood cultures with a  $>5:1$  ratio CVC versus peripheral.

### CATHETER-SUSPECTED BLOOD STREAM INFECTION

Criterion

- NEGATIVE blood cultures in the presence of parenteral antimicrobials, and
- Clinical evidence of a systemic response to infection, and
- Clinical condition improves following removal of CVC, and
- No other likely source of infection

### CENTRAL VENOUS CATHETER (CVC)

Criterion

- An intravascular device terminating in one of the great veins or pulmonary artery, including those in, or near, the right atrium, and those inserted via a femoral vein.
- Includes PICCs, haemodialysis catheters, parenteral nutrition catheters

**ESM 1 (Cont): DEFINITIONS****PAEDIATRIC SYSTEMIC INFLAMMATORY RESPONSE SYNDROME:****The presence of at least 2 of the following four criteria, one of which must be abnormal temperature or leukocyte count:**

- Core temperature of >38.5 or <36 degrees Celsius;
- Tachycardia defined as a mean heart rate >2SD above normal for age in the absence of external stimulus, chronotropic drugs or painful stimuli OR for children <1 year old: bradycardia defined as a mean heart rate <10<sup>TH</sup> percentile for age in the absence of external vagal stimuli, beta blocker drugs or congenital heart disease ;
- Mean respiratory rate >2SD above normal for age or mechanical ventilation for an acute process not related to underlying neuromuscular disease or receipt of general anaesthesia
- Leukocyte count elevated or depressed for age (not secondary to chemotherapy induced leukopenia) or >10% immature neutrophils

**AGE SPECIFIC VITAL SIGNS AND LABORATORY VARIABLES (LOWER VALUES FOR HEART RATE, LEUKOCYTE COUNT AND SYSTOLIC BP ARE FOR THE 5<sup>TH</sup> PERCENTILE, AND UPPER VALUES FOR HEART RATE, RESPIRATION RATE OR LEUKOCYTE COUNT FOR THE 95<sup>TH</sup> PERCENTILE)**

|                   | Heart Rate  |             | Respiratory rate | Leukocyte count                  | Systolic BP |
|-------------------|-------------|-------------|------------------|----------------------------------|-------------|
| Age group         | Tachycardia | Bradycardia | Breaths/min      | Leukocytes x 10 <sup>3</sup> /mm | mm Hg       |
| 0 days-1 week     | >180        | <100        | >50              | >34                              | <65         |
| 1 week to 1 month | >180        | <100        | >40              | >19.5 or <5                      | <75         |
| 1 month to 1 year | >180        | <90         | >34              | >17.5 or <5                      | <100        |
| 2-5 years         | >140        | NA          | >22              | >15.5 or <5                      | <94         |
| 6-12 years        | >130        | NA          | >18              | >13.5 or <4.5                    | <105        |
| 13 - <18 years    | >110        | NA          | >14              | >11 or <4.5                      | <117        |

*Goldstein B et al. International pediatric sepsis consensus conference: Definitions for sepsis and organ dysfunction in pediatrics. Pediatric Critical Care Medicine 2005;6:2-8***CLASSIFICATION OF CVC-BSIs AS PRE-ICU OR ICU-ACQUIRED**

- **Pre-ICU:** diagnosed within 48hrs of ICU admission
- **ICU-acquired:** diagnosed after 48hrs of ICU admission and within 48 hrs of ICU discharge

**MEASURES OF EXPOSURE:** Recorded at a daily census in each ICU, and summed over one month

- **CVC-patient days:** the number of patients with one or more CVCs at the census time-point, and summed over one month
- **Total CVC days:** the total number of CVCs in use at the census time point, and summed over one month
- **Total patient days:** the number of patients in the ICU at the census time-point, and summed over one month
- **CVC-BSI rate:** the sum of CRBSIs and CABSIs expressed per 1000 CVC-patient days.
- **CVC utilization ratio:** CVC-patient days per 100 patient days
